# Supplementary material
Source: PubMed Central journal article supplement (PMC5830141)
Supplement: NIHMS931472-supplement-Supplemental_Material.pdf [file NIHMS931472-supplement-Supplemental_Material.pdf]

# Supplemental Material: Model for screened, charge-regulated electrostatics of an eye lens protein: bovine gammaB-crystallin

## I. DESCRIPTION OF SUPPLEMENTAL FIGURES AND TABLES

**Figure 1:** The quilted pattern in Fig. 1(a) shows the contribution of each pairing of the top-ranked 100 configurations at  $pH$  7.1. The configuration probabilities are laid out as the lengths of line segments, in rank order from left to right and bottom to top, all within a square having side lengths 1. Therefore, the area of each rectangle gives the product of the probabilities of two of the top-ranked 100 patterns, an approximation to the probability of the occurrence of a given pair, ignoring biasing for simplicity. For example, the sum of the areas of the two rectangles outlined in yellow gives the probability that one member of a neighboring pair of proteins will be in configuration 1, while the other will be in configuration 7. The corresponding surface voltage maps of configurations 1 and 7 are shown in Figs. 1(b) and (c), respectively. Clearly, the study of numerous *pairs* of protonation configurations is needed to fill up the square in Fig. 1(a), to quantitatively model the relevant interactions.

**Figure 2:** Each of the prominent red bars in the perspective view of the work-of-charging shown in Fig. 2 has a magnitude  $3 < 3\phi/k_B T < 8$  and corresponds to a charge pair or a charge triple involving either Glu or Asp residues and neighboring Lys or Arg residues.

**Figure 3(a)** illustrates Eq.(14) of the text, which im-

plies that for all protonation patterns sharing the same number of bound, titratable protons, plots of the logarithm of the pattern probability vs.  $pH$  will be congruent and vertically displaced from one another.

**Figure 3(b)** displays the joint dependence of pattern probabilities  $P_n$  on both  $pH$  and net charge, in which arches of  $\log_{10} P_n$  vs.  $pH$ , like those in Fig. 3(a), link pattern probability points  $(\log_{10} P_n, q_{net})$  in graphs of the  $(\log_{10} P_n$  vs. protein net charge  $q_{net}$ ).  $(\log_{10} P_n, q_{net})$  graphs are shown for  $pH$  values of 7.1, 5.5, and 4.5, and are the same as those that appear in Fig. 12 of the text.

**Figure 4** displays a table giving the number of times each residue switched protonation states during Monte Carlo simulations of  $10^8$  iterations, at a range of  $pH$  values.

**Figure 5** displays a table giving the  $pK_{eff, \alpha_*}$  values at  $pH$  4.5 and 7.1 for each residue, together with those for which  $pK_{1/2}$  was calculated.  $pK_{1/2}$  values given in the table are those that occurred within the  $pH$  ranges of the sets of simulations used for generating Fig. 15(a) of the text. The remaining residues did not have  $pK_{1/2}$  values within the selected range.

**Figs. (6 and 7), (8 and 9), and (10 and 11)** tabulate the work-of-charging matrices calculated for Debye screening lengths of 6Å, 12Å, and 20Å, respectively. Table entries are in the dimensionless units of  $e\phi_{ij}/k_B T$ . In each matrix, the order of residues is the same as that in Fig. 2 of the Supplementary Material, and in Figs. 3(a), 16(a), and 16(b) of the text.

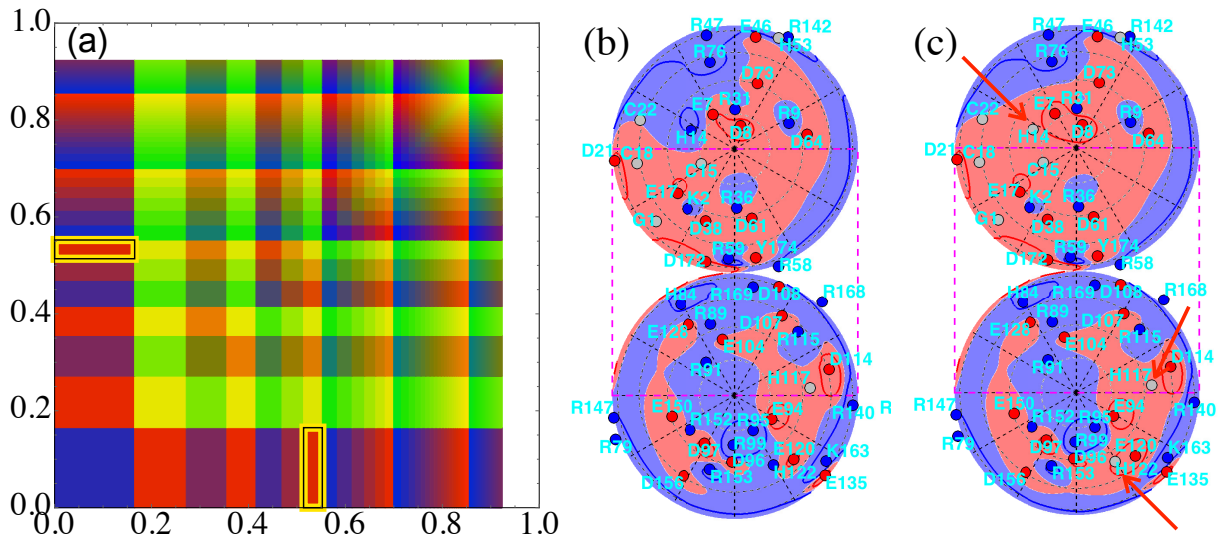

FIG. 1. (color online) (a) Illustration of the scope of the problem of estimating protein-protein interaction strengths while accounting for the probability distribution of protonation patterns, at  $pH$  7.1 and Debye length 6 Å. Modeled configuration probabilities for isolated proteins are given by the lengths of line segments, proceeding in rank order from left to right and bottom to top, inside a square of area 1. The area of each rectangle approximates a configuration-pair probability (see text). (b) and (c): Surface voltage projections of configurations 1, in panel (b) and 7, in panel (c), whose joint probability is estimated by the area of the rectangles highlighted in yellow in (a).

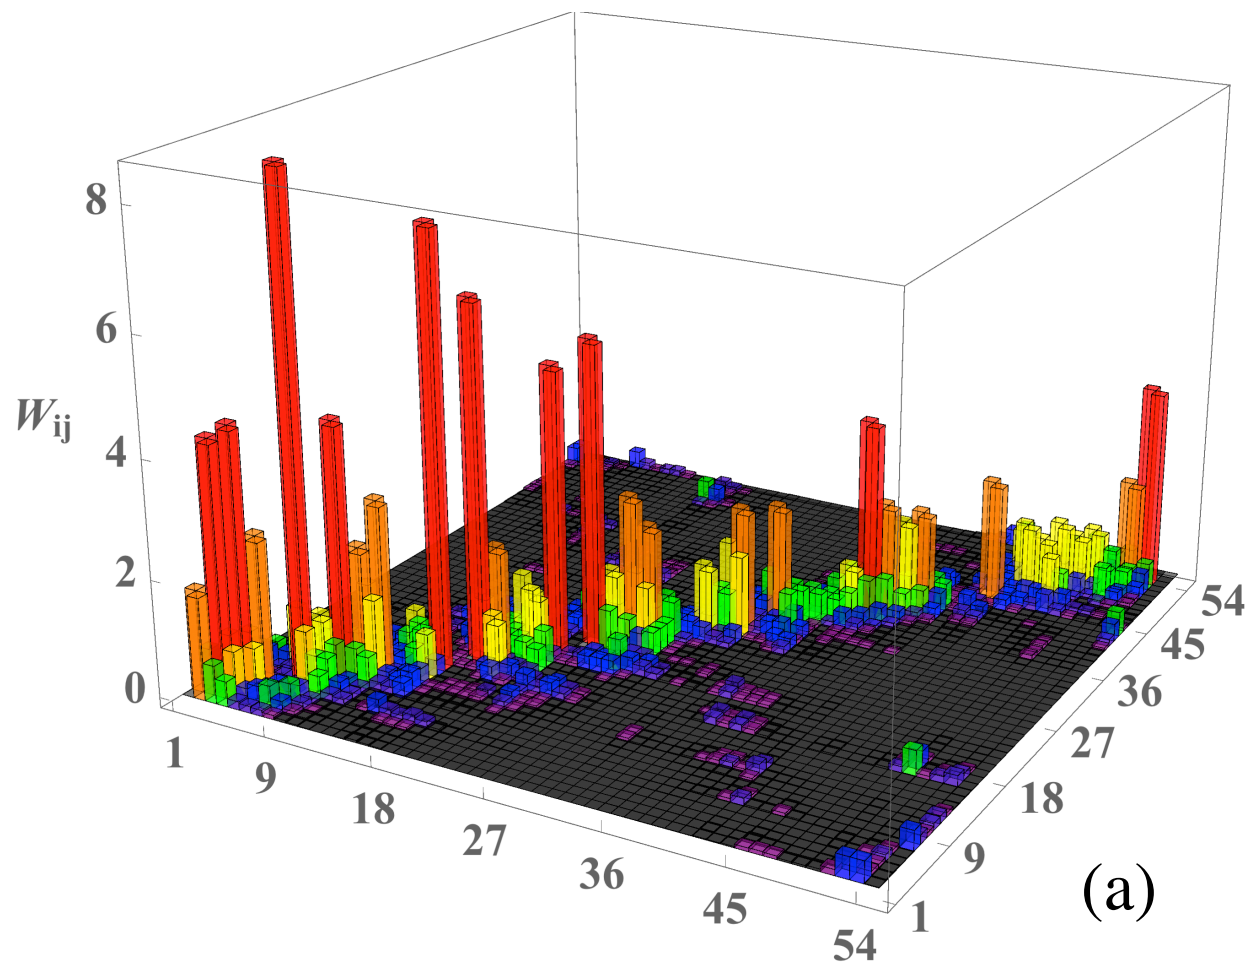

FIG. 2. (color online) (a): Perspective view of the work-of-charging entries  $W_{ij}$  used in the present model and displayed as a color map in Fig. 3(a) of the text. The vertical scale is in the units  $e\phi/k_B T$ , and the residue order and color code are also as in Fig. 3(a) of the text.

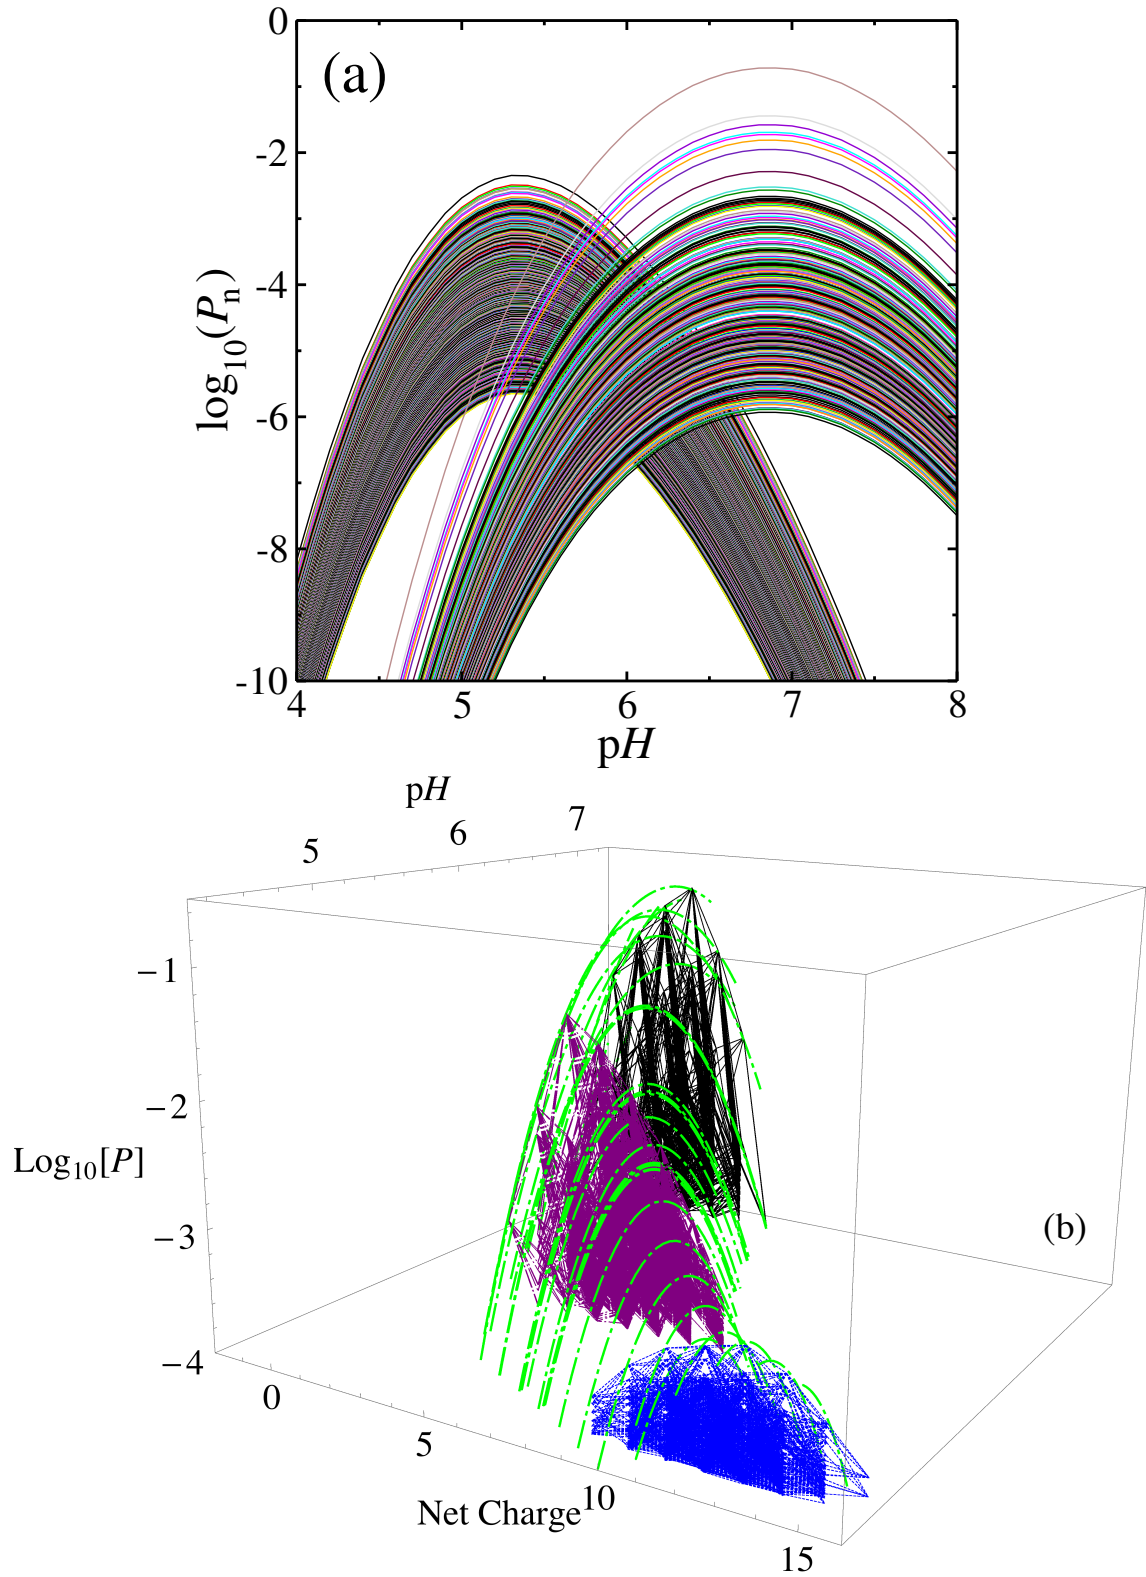

FIG. 3. (color online) (a)  $\log_{10} P_\alpha$  vs.  $\text{pH}$  for protonation configurations  $\alpha$  that have fixed titratable proton occupancies,  $n$ , of  $n = 34$  (net charge  $+8e$ , arches with peaks near  $\text{pH} = 5.3$ ) and  $n = 28$  (net charge  $+2e$ , arches with peaks near  $\text{pH} = 6.8$ ). The plot includes all such patterns that occurred in the Monte Carlo simulations at least once per million time steps. For configurations  $\alpha$  having the same  $n$ , the congruence of the arches illustrates Eq. (14) in the text. (b) Illustration of the combined dependence of configuration probabilities on  $\text{pH}$  and net protein charge; the fixed  $\text{pH}$  patterns in Fig. 12 of the text are shown (black, solid -  $\text{pH} 7.1$ ; blue, dash-dotted -  $\text{pH} 5.5$ ; purple, dotted -  $\text{pH} 4.5$ ) together with topmost  $\text{pH}$  dependence configuration probability arches like those in Fig. 14(a) of the text (green, dash-dotted).

| Index | Residue | pK <sub>eff</sub> | pH      |         |         |         |         |         |         |         |        |
|-------|---------|-------------------|---------|---------|---------|---------|---------|---------|---------|---------|--------|
|       |         |                   | 4.0     | 4.5     | 5.0     | 5.5     | 6.0     | 6.5     | 7.0     | 7.5     | 8.0    |
| 1     | ARG009  | 12.45             | 0       | 2       | 0       | 2       | 0       | 8       | 22      | 40      | 94     |
| 2     | ARG031  | 12.90             | 0       | 0       | 0       | 0       | 0       | 2       | 6       | 14      | 38     |
| 3     | ARG036  | 14.04             | 0       | 2       | 0       | 0       | 0       | 0       | 0       | 4       | 8      |
| 4     | ARG047  | 11.33             | 4       | 2       | 6       | 4       | 30      | 84      | 172     | 580     | 1768   |
| 5     | ARG058  | 10.70             | 4       | 6       | 6       | 10      | 60      | 204     | 700     | 2154    | 6514   |
| 6     | ARG059  | 14.66             | 0       | 0       | 0       | 0       | 0       | 0       | 0       | 0       | 0      |
| 7     | ARG076  | 11.50             | 0       | 0       | 2       | 6       | 10      | 30      | 104     | 350     | 1072   |
| 8     | ARG079  | 9.48              | 76      | 158     | 248     | 614     | 1522    | 4320    | 12284   | 34827   | 99532  |
| 9     | ARG089  | 14.33             | 0       | 0       | 0       | 0       | 0       | 0       | 0       | 0       | 0      |
| 10    | ARG091  | 11.88             | 0       | 0       | 4       | 0       | 2       | 30      | 40      | 144     | 420    |
| 11    | ARG095  | 11.54             | 0       | 0       | 0       | 6       | 14      | 32      | 102     | 276     | 802    |
| 12    | ARG099  | 11.47             | 0       | 0       | 0       | 0       | 18      | 38      | 96      | 340     | 872    |
| 13    | ARG115  | 14.93             | 0       | 0       | 0       | 0       | 0       | 0       | 0       | 0       | 0      |
| 14    | ARG140  | 11.22             | 0       | 4       | 4       | 10      | 40      | 74      | 192     | 668     | 1908   |
| 15    | ARG142  | 11.79             | 2       | 4       | 8       | 16      | 42      | 56      | 90      | 230     | 548    |
| 16    | ARG147  | 9.10              | 92      | 182     | 496     | 1264    | 3384    | 9796    | 28046   | 80846   | 226790 |
| 17    | ARG152  | 13.29             | 2       | 0       | 2       | 0       | 0       | 0       | 4       | 2       | 14     |
| 18    | ARG153  | 12.00             | 0       | 0       | 0       | 2       | 2       | 12      | 32      | 96      | 310    |
| 19    | ARG168  | 10.73             | 0       | 0       | 14      | 32      | 80      | 238     | 638     | 2008    | 5872   |
| 20    | ARG169  | 12.54             | 0       | 0       | 0       | 0       | 2       | 0       | 6       | 14      | 54     |
| 21    | ASP008  | 4.80              | 1207216 | 1508143 | 1028229 | 503705  | 200438  | 70224   | 24124   | 8124    | 2680   |
| 22    | ASP021  | 4.18              | 1604964 | 814262  | 352546  | 138932  | 51122   | 17466   | 6050    | 2136    | 826    |
| 23    | ASP038  | 4.54              | 1515987 | 965084  | 518369  | 254048  | 105450  | 38230   | 13172   | 4434    | 1642   |
| 24    | ASP061  | 3.29              | 311268  | 132396  | 52270   | 19482   | 6738    | 2288    | 722     | 252     | 72     |
| 25    | ASP064  | 4.62              | 1152229 | 1630624 | 876870  | 372588  | 137194  | 46960   | 15346   | 5122    | 1576   |
| 26    | ASP073  | 4.99              | 813294  | 1473494 | 1390030 | 691062  | 282319  | 101742  | 35580   | 11678   | 3696   |
| 27    | ASP096  | 4.31              | 1523611 | 904832  | 453098  | 193978  | 73962   | 27928   | 11344   | 4692    | 1812   |
| 28    | ASP097  | 4.43              | 1565750 | 1257299 | 633382  | 260278  | 92820   | 30740   | 10296   | 3322    | 1102   |
| 29    | ASP107  | 1.45              | 6876    | 2358    | 890     | 274     | 86      | 34      | 8       | 2       | 0      |
| 30    | ASP108  | 2.07              | 25712   | 9452    | 3404    | 1400    | 442     | 156     | 34      | 22      | 2      |
| 31    | ASP114  | 5.12              | 433154  | 1056159 | 1665802 | 810164  | 326122  | 124174  | 44922   | 15420   | 5048   |
| 32    | ASP156  | 4.75              | 986935  | 1653361 | 1119676 | 493318  | 183126  | 63134   | 21738   | 7392    | 2546   |
| 33    | ASP172  | 1.90              | 8018    | 3412    | 1538    | 656     | 244     | 94      | 28      | 12      | 4      |
| 34    | CYS015  | 11.81             | 0       | 2       | 0       | 4       | 16      | 16      | 42      | 156     | 468    |
| 35    | CYS018  | 12.07             | 0       | 2       | 2       | 2       | 2       | 8       | 28      | 88      | 282    |
| 36    | CYS022  | 11.59             | 0       | 0       | 0       | 2       | 8       | 34      | 106     | 278     | 834    |
| 37    | GLU007  | 5.00              | 733232  | 1387677 | 1501949 | 782490  | 329782  | 130234  | 54494   | 24066   | 9826   |
| 38    | GLU017  | 5.30              | 445620  | 870076  | 1405852 | 1283262 | 585752  | 219458  | 75330   | 25962   | 9060   |
| 39    | GLU046  | 4.94              | 528430  | 282706  | 216726  | 154856  | 109600  | 62484   | 27264   | 9690    | 3402   |
| 40    | GLU094  | 5.19              | 384519  | 903696  | 1712407 | 1031340 | 431608  | 164446  | 60126   | 21579   | 7244   |
| 41    | GLU104  | 3.42              | 649235  | 249132  | 87470   | 29006   | 9486    | 3190    | 1082    | 354     | 122    |
| 42    | GLU120  | 4.81              | 909308  | 1630102 | 1122896 | 557450  | 267074  | 138782  | 79970   | 41420   | 18176  |
| 43    | GLU128  | 2.88              | 201138  | 75580   | 26850   | 9896    | 4074    | 2162    | 1272    | 668     | 328    |
| 44    | GLU135  | 4.25              | 1575144 | 782331  | 329837  | 127018  | 48358   | 18280   | 7544    | 3250    | 1592   |
| 45    | GLU150  | 4.30              | 1629936 | 1072270 | 503488  | 198368  | 68900   | 22922   | 7642    | 2570    | 782    |
| 46    | GLY001  | 5.29              | 343719  | 763334  | 1493171 | 1278115 | 571894  | 210808  | 72896   | 24882   | 8186   |
| 47    | HIS014  | 7.54              | 4644    | 10964   | 25140   | 55532   | 129670  | 336078  | 849346  | 1762482 | 953834 |
| 48    | HIS053  | 6.30              | 163624  | 217656  | 282837  | 557566  | 1240878 | 1400626 | 622448  | 230854  | 80382  |
| 49    | HIS084  | 7.39              | 3618    | 7656    | 18664   | 52226   | 150686  | 425846  | 1064364 | 1632957 | 751248 |
| 50    | HIS117  | 6.53              | 22072   | 59752   | 152516  | 374804  | 890453  | 1766880 | 953378  | 378898  | 131938 |
| 51    | HIS122  | 7.29              | 36604   | 62834   | 97338   | 152512  | 282198  | 591766  | 1262877 | 1410771 | 632738 |
| 52    | LYS002  | 9.80              | 388     | 542     | 736     | 1046    | 1572    | 2692    | 6752    | 18934   | 56178  |
| 53    | LYS163  | 8.41              | 896     | 1694    | 3246    | 7292    | 18612   | 50054   | 137774  | 368724  | 913894 |
| 54    | TYR174  | 4.61              | 817254  | 1712936 | 1022693 | 408946  | 142650  | 47274   | 14912   | 4898    | 1546   |

FIG. 4. The number of times each residue switched protonation states during Monte Carlo simulations of  $10^8$  iterations, at each of the pH values tabulated.

| index | residue | $pK_{1/2}$     | $pH = 4.5$          |                     | $pH = 7.1$          |                       |
|-------|---------|----------------|---------------------|---------------------|---------------------|-----------------------|
|       |         |                | $pK_{eff,\alpha_*}$ | $pK_{eff,\alpha_*}$ | $pK_{eff,\alpha_*}$ | $pK_{int,\epsilon=3}$ |
| 01    | R9      | — <sup>a</sup> | 12.09               | 12.45               | 11.30               |                       |
| 02    | R31     | —              | 11.90               | 12.90               | 11.30               |                       |
| 03    | R36     | —              | 13.78               | 14.04               | 11.30               |                       |
| 04    | R47     | 11.57          | 10.88               | 11.33               | 11.30               |                       |
| 05    | R58     | 11.33          | 10.45               | 10.70               | 11.30               |                       |
| 06    | R59     | —              | 14.17               | 14.66               | 11.30               |                       |
| 07    | R76     | 11.80          | 11.02               | 11.50               | 11.30               |                       |
| 08    | R79     | —              | 9.20                | 9.48                | 11.30               |                       |
| 09    | R89     | —              | 14.29               | 14.33               | 11.30               |                       |
| 10    | R91     | —              | 11.82               | 11.88               | 11.30               |                       |
| 11    | R95     | 11.89          | 10.85               | 11.54               | 11.30               |                       |
| 12    | R99     | 12.00          | 11.25               | 11.47               | 11.30               |                       |
| 13    | R115    | —              | 14.69               | 14.93               | 11.30               |                       |
| 14    | R140    | 11.55          | 10.96               | 11.22               | 11.30               |                       |
| 15    | R142    | —              | 10.82               | 11.79               | 11.30               |                       |
| 16    | R147    | 9.45           | 8.80                | 9.10                | 11.30               |                       |
| 17    | R152    | —              | 13.06               | 13.29               | 11.30               |                       |
| 18    | R153    | —              | 11.46               | 12.00               | 11.30               |                       |
| 19    | R168    | 11.73          | 10.51               | 10.73               | 11.30               |                       |
| 20    | R169    | —              | 12.39               | 12.54               | 11.30               |                       |
| 21    | D8      | 4.42           | 4.29                | 4.80                | 5.41                |                       |
| 22    | D21     | 3.88           | 3.90                | 4.18                | 5.41                |                       |
| 23    | D38     | 3.91           | 3.89                | 4.54                | 5.41                |                       |
| 24    | D61     | 2.73           | 3.11                | 3.29                | 5.41                |                       |
| 25    | D64     | 4.39           | 4.38                | 4.62                | 5.41                |                       |
| 26    | D73     | 4.72           | 4.79                | 4.99                | 5.41                |                       |
| 27    | D96     | 3.82           | 3.94                | 4.31                | 5.41                |                       |
| 28    | D97     | 4.09           | 4.23                | 4.43                | 5.41                |                       |
| 29    | D107    | —              | 1.31                | 1.45                | 5.41                |                       |
| 30    | D108    | 1.60           | 1.85                | 2.07                | 5.41                |                       |
| 31    | D114    | 4.91           | 4.89                | 5.12                | 5.41                |                       |
| 32    | D156    | 4.57           | 4.67                | 4.75                | 5.41                |                       |
| 33    | D172    | —              | 1.33                | 1.90                | 5.41                |                       |
| 34    | C15     | —              | 11.32               | 11.81               | 12.00               |                       |
| 35    | C18     | —              | 11.27               | 12.07               | 12.00               |                       |
| 36    | C22     | —              | 11.33               | 11.59               | 12.00               |                       |
| 37    | E7      | 4.79           | 4.85                | 5.00                | 5.80                |                       |
| 38    | E17     | 5.17           | 5.14                | 5.30                | 5.80                |                       |
| 39    | E46     | 3.14           | 3.26                | 4.94                | 5.80                |                       |
| 40    | E94     | 5.03           | 4.97                | 5.19                | 5.80                |                       |
| 41    | E104    | 3.25           | 3.37                | 3.42                | 5.80                |                       |
| 42    | E120    | 4.59           | 4.59                | 4.81                | 5.80                |                       |
| 43    | E128    | 2.44           | 2.84                | 2.88                | 5.80                |                       |
| 44    | E135    | 3.86           | 3.88                | 4.25                | 5.80                |                       |
| 45    | E150    | 4.01           | 4.10                | 4.30                | 5.80                |                       |
| 46    | G1      | 5.19           | 5.13                | 5.29                | 4.88                |                       |
| 47    | H14     | 7.54           | 6.91                | 7.54                | 7.05                |                       |
| 48    | H53     | 6.28           | 6.14                | 6.30                | 6.04                |                       |
| 49    | H84     | 7.40           | 7.29                | 7.39                | 6.91                |                       |
| 50    | H117    | 6.53           | 6.20                | 6.53                | 6.37                |                       |
| 51    | H122    | 7.27           | 6.13                | 7.29                | 6.32                |                       |
| 52    | K2      | 9.83           | 8.78                | 9.80                | 7.98                |                       |
| 53    | K163    | 8.50           | 8.05                | 8.41                | 7.98                |                       |
| 54    | Y174    | 4.57           | 4.57                | 4.61                | 4.95                |                       |

<sup>a</sup>Value not computed, see Supplemental Material text.

<sup>b</sup> $\alpha_*$  denotes the most prominent configuration at the given  $pH$ .

FIG. 5. Residue-by-residue table of  $pK_{eff,\alpha_*}$  at  $pH$  4.5 and 7.1.

|      |      |        |        |        |        |        |        |        |        |        |        |        |        |        |        |        |        |        |        |        |        |        |        |        |        |        |
|------|------|--------|--------|--------|--------|--------|--------|--------|--------|--------|--------|--------|--------|--------|--------|--------|--------|--------|--------|--------|--------|--------|--------|--------|--------|--------|
| R91  | E104 | R89    | E128   | H84    | R115   | D107   | R169   | D108   | R168   | R58    | Y174   | R59    | D172   | R147   | R79    | D21    | G1     | C18    | C22    | D61    | R36    | D38    | K2     | E17    | C15    | H14    |
| E104 |      | 4.2335 | 4.4197 | 2.5534 | 0.6990 | 0.1294 | 1.4631 | 0.1886 | 0.1312 | 0.4786 | 1.0931 | 0.7560 | 0.2210 | 0.1322 | 0.0447 | 0.0297 | 0.0346 | 0.0232 | 0.0336 | 0.0210 | 0.0152 | 0.0496 | 0.0071 | 0.0028 | 0.0034 | 0.0009 |
| R89  |      |        | 4.4197 | 2.5534 | 0.6990 | 0.1294 | 1.4631 | 0.1886 | 0.1312 | 0.4786 | 1.0931 | 0.7560 | 0.2210 | 0.1322 | 0.0447 | 0.0297 | 0.0346 | 0.0232 | 0.0336 | 0.0210 | 0.0152 | 0.0496 | 0.0071 | 0.0028 | 0.0034 | 0.0009 |
| E128 |      |        |        | 2.5534 | 0.6990 | 0.1294 | 1.4631 | 0.1886 | 0.1312 | 0.4786 | 1.0931 | 0.7560 | 0.2210 | 0.1322 | 0.0447 | 0.0297 | 0.0346 | 0.0232 | 0.0336 | 0.0210 | 0.0152 | 0.0496 | 0.0071 | 0.0028 | 0.0034 | 0.0009 |
| H84  |      |        |        |        | 0.6990 | 0.1294 | 1.4631 | 0.1886 | 0.1312 | 0.4786 | 1.0931 | 0.7560 | 0.2210 | 0.1322 | 0.0447 | 0.0297 | 0.0346 | 0.0232 | 0.0336 | 0.0210 | 0.0152 | 0.0496 | 0.0071 | 0.0028 | 0.0034 | 0.0009 |
| R115 |      |        |        |        |        | 0.1294 | 1.4631 | 0.1886 | 0.1312 | 0.4786 | 1.0931 | 0.7560 | 0.2210 | 0.1322 | 0.0447 | 0.0297 | 0.0346 | 0.0232 | 0.0336 | 0.0210 | 0.0152 | 0.0496 | 0.0071 | 0.0028 | 0.0034 | 0.0009 |
| D107 |      |        |        |        |        |        | 1.4631 | 0.1886 | 0.1312 | 0.4786 | 1.0931 | 0.7560 | 0.2210 | 0.1322 | 0.0447 | 0.0297 | 0.0346 | 0.0232 | 0.0336 | 0.0210 | 0.0152 | 0.0496 | 0.0071 | 0.0028 | 0.0034 | 0.0009 |
| R169 |      |        |        |        |        |        |        | 0.1886 | 0.1312 | 0.4786 | 1.0931 | 0.7560 | 0.2210 | 0.1322 | 0.0447 | 0.0297 | 0.0346 | 0.0232 | 0.0336 | 0.0210 | 0.0152 | 0.0496 | 0.0071 | 0.0028 | 0.0034 | 0.0009 |
| D108 |      |        |        |        |        |        |        |        | 0.1312 | 0.4786 | 1.0931 | 0.7560 | 0.2210 | 0.1322 | 0.0447 | 0.0297 | 0.0346 | 0.0232 | 0.0336 | 0.0210 | 0.0152 | 0.0496 | 0.0071 | 0.0028 | 0.0034 | 0.0009 |
| R168 |      |        |        |        |        |        |        |        |        | 0.4786 | 1.0931 | 0.7560 | 0.2210 | 0.1322 | 0.0447 | 0.0297 | 0.0346 | 0.0232 | 0.0336 | 0.0210 | 0.0152 | 0.0496 | 0.0071 | 0.0028 | 0.0034 | 0.0009 |
| R58  |      |        |        |        |        |        |        |        |        |        | 1.0931 | 0.7560 | 0.2210 | 0.1322 | 0.0447 | 0.0297 | 0.0346 | 0.0232 | 0.0336 | 0.0210 | 0.0152 | 0.0496 | 0.0071 | 0.0028 | 0.0034 | 0.0009 |
| Y174 |      |        |        |        |        |        |        |        |        |        |        | 0.7560 | 0.2210 | 0.1322 | 0.0447 | 0.0297 | 0.0346 | 0.0232 | 0.0336 | 0.0210 | 0.0152 | 0.0496 | 0.0071 | 0.0028 | 0.0034 | 0.0009 |
| R59  |      |        |        |        |        |        |        |        |        |        |        |        | 0.2210 | 0.1322 | 0.0447 | 0.0297 | 0.0346 | 0.0232 | 0.0336 | 0.0210 | 0.0152 | 0.0496 | 0.0071 | 0.0028 | 0.0034 | 0.0009 |
| D172 |      |        |        |        |        |        |        |        |        |        |        |        |        | 0.1322 | 0.0447 | 0.0297 | 0.0346 | 0.0232 | 0.0336 | 0.0210 | 0.0152 | 0.0496 | 0.0071 | 0.0028 | 0.0034 | 0.0009 |
| R147 |      |        |        |        |        |        |        |        |        |        |        |        |        |        | 0.0447 | 0.0297 | 0.0346 | 0.0232 | 0.0336 | 0.0210 | 0.0152 | 0.0496 | 0.0071 | 0.0028 | 0.0034 | 0.0009 |
| D39  |      |        |        |        |        |        |        |        |        |        |        |        |        |        |        | 0.0297 | 0.0346 | 0.0232 | 0.0336 | 0.0210 | 0.0152 | 0.0496 | 0.0071 | 0.0028 | 0.0034 | 0.0009 |
| D21  |      |        |        |        |        |        |        |        |        |        |        |        |        |        |        |        | 0.0346 | 0.0232 | 0.0336 | 0.0210 | 0.0152 | 0.0496 | 0.0071 | 0.0028 | 0.0034 | 0.0009 |
| G1   |      |        |        |        |        |        |        |        |        |        |        |        |        |        |        |        |        | 0.0232 | 0.0336 | 0.0210 | 0.0152 | 0.0496 | 0.0071 | 0.0028 | 0.0034 | 0.0009 |
| C18  |      |        |        |        |        |        |        |        |        |        |        |        |        |        |        |        |        |        | 0.0336 | 0.0210 | 0.0152 | 0.0496 | 0.0071 | 0.0028 | 0.0034 | 0.0009 |
| C22  |      |        |        |        |        |        |        |        |        |        |        |        |        |        |        |        |        |        |        | 0.0210 | 0.0152 | 0.0496 | 0.0071 | 0.0028 | 0.0034 | 0.0009 |
| D61  |      |        |        |        |        |        |        |        |        |        |        |        |        |        |        |        |        |        |        |        | 0.0152 | 0.0496 | 0.0071 | 0.0028 | 0.0034 | 0.0009 |
| R36  |      |        |        |        |        |        |        |        |        |        |        |        |        |        |        |        |        |        |        |        |        | 0.0496 | 0.0071 | 0.0028 | 0.0034 | 0.0009 |
| D38  |      |        |        |        |        |        |        |        |        |        |        |        |        |        |        |        |        |        |        |        |        |        | 0.0071 | 0.0028 | 0.0034 | 0.0009 |
| K2   |      |        |        |        |        |        |        |        |        |        |        |        |        |        |        |        |        |        |        |        |        |        |        | 0.0028 | 0.0034 | 0.0009 |
| E17  |      |        |        |        |        |        |        |        |        |        |        |        |        |        |        |        |        |        |        |        |        |        |        |        | 0.0034 | 0.0009 |
| C15  |      |        |        |        |        |        |        |        |        |        |        |        |        |        |        |        |        |        |        |        |        |        |        |        |        | 0.0009 |
| H14  |      |        |        |        |        |        |        |        |        |        |        |        |        |        |        |        |        |        |        |        |        |        |        |        |        | 0.0000 |

FIG. 6. Work-of-charging matrix modeled for Debye screening length  $6\text{\AA}$ , first part. The order of residues is the same as in Fig. 2 of the Supplementary Material, and in Figs. 3(a), 16(a), and 16(b) of the text. Entries are in the dimensionless units of  $e\phi_{ij}/k_B T$ .





|      |      |        |        |        |        |        |        |        |        |        |        |        |        |        |        |        |        |        |        |        |        |        |        |        |        |        |
|------|------|--------|--------|--------|--------|--------|--------|--------|--------|--------|--------|--------|--------|--------|--------|--------|--------|--------|--------|--------|--------|--------|--------|--------|--------|--------|
| R91  | E104 | R89    | E128   | H84    | R115   | D107   | R169   | D108   | R168   | R58    | Y174   | R59    | DI72   | R147   | R79    | D21    | G1     | C18    | C22    | D61    | R36    | D38    | K2     | E17    | C15    | H14    |
| E104 |      | 1.9171 | 0.7890 | 0.5631 | 0.2188 | 0.1753 | 0.1707 | 0.1160 | 0.0687 | 0.0367 | 0.0236 | 0.0142 | 0.0145 | 0.0273 | 0.0856 | 0.0623 | 0.0522 | 0.0232 | 0.0166 | 0.0146 | 0.0047 | 0.0033 | 0.0051 | 0.0049 | 0.0048 | 0.0025 |
| R89  |      |        |        | 4.4382 | 0.9885 | 0.3587 | 0.4771 | 0.5534 | 0.3013 | 0.1530 | 0.0682 | 0.0495 | 0.0326 | 0.0267 | 0.0432 | 0.0535 | 0.0396 | 0.0256 | 0.0146 | 0.0107 | 0.0088 | 0.0055 | 0.0074 | 0.0064 | 0.0054 | 0.0029 |
| E128 |      |        |        |        |        |        |        | 2.7241 | 0.3760 | 0.5172 | 0.5179 | 0.2105 | 0.0853 | 0.0663 | 0.0464 | 0.0406 | 0.0796 | 0.0696 | 0.0522 | 0.0596 | 0.0420 | 0.0216 | 0.0151 | 0.0121 | 0.0078 | 0.0112 |
| H84  |      |        |        |        |        |        |        |        |        |        | 0.1860 | 0.1328 | 0.1972 | 0.3584 | 0.1540 | 0.0678 | 0.0525 | 0.0377 | 0.0462 | 0.0979 | 0.1407 | 0.1060 | 0.1355 | 0.0813 | 0.0420 | 0.0369 |
| R115 |      |        |        |        |        |        |        |        |        |        |        |        |        |        |        |        |        |        |        |        |        |        |        |        |        |        |
| D107 |      |        |        |        |        |        |        |        |        |        |        |        |        |        |        |        |        |        |        |        |        |        |        |        |        |        |
| D108 |      |        |        |        |        |        |        |        |        |        |        |        |        |        |        |        |        |        |        |        |        |        |        |        |        |        |
| R168 |      |        |        |        |        |        |        |        |        |        |        |        |        |        |        |        |        |        |        |        |        |        |        |        |        |        |
| R58  |      |        |        |        |        |        |        |        |        |        |        |        |        |        |        |        |        |        |        |        |        |        |        |        |        |        |
| Y174 |      |        |        |        |        |        |        |        |        |        |        |        |        |        |        |        |        |        |        |        |        |        |        |        |        |        |
| R59  |      |        |        |        |        |        |        |        |        |        |        |        |        |        |        |        |        |        |        |        |        |        |        |        |        |        |
| D172 |      |        |        |        |        |        |        |        |        |        |        |        |        |        |        |        |        |        |        |        |        |        |        |        |        |        |
| R147 |      |        |        |        |        |        |        |        |        |        |        |        |        |        |        |        |        |        |        |        |        |        |        |        |        |        |
| D21  |      |        |        |        |        |        |        |        |        |        |        |        |        |        |        |        |        |        |        |        |        |        |        |        |        |        |
| C18  |      |        |        |        |        |        |        |        |        |        |        |        |        |        |        |        |        |        |        |        |        |        |        |        |        |        |
| C22  |      |        |        |        |        |        |        |        |        |        |        |        |        |        |        |        |        |        |        |        |        |        |        |        |        |        |
| D61  |      |        |        |        |        |        |        |        |        |        |        |        |        |        |        |        |        |        |        |        |        |        |        |        |        |        |
| D38  |      |        |        |        |        |        |        |        |        |        |        |        |        |        |        |        |        |        |        |        |        |        |        |        |        |        |
| K2   |      |        |        |        |        |        |        |        |        |        |        |        |        |        |        |        |        |        |        |        |        |        |        |        |        |        |
| E17  |      |        |        |        |        |        |        |        |        |        |        |        |        |        |        |        |        |        |        |        |        |        |        |        |        |        |
| C15  |      |        |        |        |        |        |        |        |        |        |        |        |        |        |        |        |        |        |        |        |        |        |        |        |        |        |
| H14  |      |        |        |        |        |        |        |        |        |        |        |        |        |        |        |        |        |        |        |        |        |        |        |        |        |        |

FIG. 8. Work-of-charging matrix modeled for Debye screening length  $12\text{\AA}$ , first part. The order of residues is the same as in Fig. 2 of the Supplementary Material, and in Figs. 3(a), 16(a), and 16(b) of the text. Entries are in the dimensionless units of  $e\phi_{ij}/k_B T$ .



|      |      |        |        |        |        |        |        |        |        |        |        |        |        |        |        |        |        |        |        |        |        |        |        |        |        |        |        |        |
|------|------|--------|--------|--------|--------|--------|--------|--------|--------|--------|--------|--------|--------|--------|--------|--------|--------|--------|--------|--------|--------|--------|--------|--------|--------|--------|--------|--------|
| R91  | E104 | R89    | E128   | H84    | R115   | D107   | R169   | D108   | R168   | R58    | Y174   | R59    | DI72   | R147   | R79    | D21    | G1     | C18    | C22    | D61    | R36    | D38    | K2     | E17    | C15    | H14    |        |        |
|      |      | 2.0334 | 0.8943 | 0.6646 | 0.2899 | 0.2338 | 0.2334 | 0.1649 | 0.1053 | 0.0617 | 0.0474 | 0.0372 | 0.0364 | 0.0566 | 0.1365 | 0.1070 | 0.0954 | 0.0522 | 0.0388 | 0.0367 | 0.0165 | 0.0133 | 0.0177 | 0.0176 | 0.0174 | 0.0110 | 0.0112 |        |
| E104 |      |        | 4.5662 | 1.0942 | 0.4375 | 0.5660 | 0.6518 | 0.3774 | 0.2110 | 0.1065 | 0.0870 | 0.0694 | 0.0581 | 0.0807 | 0.0905 | 0.0724 | 0.0753 | 0.0562 | 0.0347 | 0.0285 | 0.0261 | 0.0189 | 0.0236 | 0.0216 | 0.0191 | 0.0123 | 0.0098 |        |
| R89  |      |        |        | 4.7195 | 1.0685 | 0.4578 | 0.6111 | 0.6004 | 0.2731 | 0.1262 | 0.1075 | 0.0896 | 0.0786 | 0.1108 | 0.1113 | 0.0893 | 0.1030 | 0.0810 | 0.0463 | 0.0365 | 0.0324 | 0.0240 | 0.0314 | 0.0292 | 0.0257 | 0.0159 | 0.0120 |        |
| E128 |      |        |        |        | 2.8376 | 0.2076 | 0.2611 | 0.4252 | 0.2030 | 0.1062 | 0.0860 | 0.0758 | 0.0855 | 0.1514 | 0.2031 | 0.1619 | 0.2027 | 0.1361 | 0.0781 | 0.0637 | 0.0320 | 0.0268 | 0.0394 | 0.0399 | 0.0379 | 0.0217 | 0.0181 |        |
| R168 |      |        |        |        |        | 8.2385 | 0.3409 | 1.2741 | 0.8416 | 0.4056 | 0.2867 | 0.1557 | 0.1085 | 0.1159 | 0.0536 | 0.0421 | 0.0412 | 0.0425 | 0.0318 | 0.0205 | 0.0624 | 0.0378 | 0.0367 | 0.0277 | 0.0213 | 0.0172 | 0.0108 |        |
| R115 |      |        |        |        |        |        | 8.8416 | 1.8527 | 0.8527 | 0.4057 | 0.2867 | 0.1557 | 0.1085 | 0.1159 | 0.0536 | 0.0421 | 0.0412 | 0.0425 | 0.0318 | 0.0205 | 0.0624 | 0.0378 | 0.0367 | 0.0277 | 0.0213 | 0.0172 | 0.0108 |        |
| D107 |      |        |        |        |        |        |        | 1.3976 | 1.0300 | 0.4056 | 0.2865 | 0.1860 | 0.1271 | 0.1397 | 0.0493 | 0.0421 | 0.0449 | 0.0552 | 0.0337 | 0.0212 | 0.0660 | 0.0405 | 0.0413 | 0.0318 | 0.0242 | 0.0184 | 0.0108 |        |
| D108 |      |        |        |        |        |        |        |        | 4.6792 | 0.8944 | 0.3085 | 0.1860 | 0.1271 | 0.1397 | 0.0493 | 0.0421 | 0.0449 | 0.0552 | 0.0337 | 0.0212 | 0.0660 | 0.0405 | 0.0413 | 0.0318 | 0.0242 | 0.0184 | 0.0108 |        |
| R169 |      |        |        |        |        |        |        |        |        | 2.5084 | 1.7802 | 0.5280 | 0.4012 | 0.5205 | 0.0923 | 0.0835 | 0.0982 | 0.1309 | 0.0713 | 0.0394 | 0.1215 | 0.0739 | 0.0808 | 0.0621 | 0.0467 | 0.0331 | 0.0177 |        |
| D108 |      |        |        |        |        |        |        |        |        |        | 3.3450 | 0.4396 | 0.4342 | 0.4697 | 0.1092 | 0.1114 | 0.1012 | 0.1169 | 0.1463 | 0.0652 | 0.3089 | 0.1613 | 0.1374 | 0.0872 | 0.0647 | 0.0592 | 0.0318 |        |
| R168 |      |        |        |        |        |        |        |        |        |        |        | 1.0648 | 0.6139 | 0.7698 | 0.9938 | 0.0809 | 0.0913 | 0.1053 | 0.1601 | 0.1762 | 0.0702 | 0.4170 | 0.2116 | 0.1898 | 0.1169 | 0.0843 | 0.0732 | 0.0347 |
| R58  |      |        |        |        |        |        |        |        |        |        |        |        | 1.0648 | 0.5095 | 0.0359 | 0.0372 | 0.0621 | 0.1660 | 0.0805 | 0.0401 | 0.3391 | 0.2029 | 0.2306 | 0.1598 | 0.1047 | 0.0758 | 0.0298 |        |
| R59  |      |        |        |        |        |        |        |        |        |        |        |        |        | 7.6493 | 0.0650 | 0.0711 | 0.1399 | 0.4784 | 0.1960 | 0.0822 | 0.5598 | 0.3465 | 0.5044 | 0.3309 | 0.2096 | 0.1315 | 0.0495 |        |
| D172 |      |        |        |        |        |        |        |        |        |        |        |        |        |        | 0.1457 | 0.1601 | 0.3417 | 1.1600 | 0.3909 | 0.1474 | 0.3291 | 0.2382 | 0.4028 | 0.3080 | 0.2222 | 0.1202 | 0.0547 |        |
| R79  |      |        |        |        |        |        |        |        |        |        |        |        |        |        |        | 6.5048 | 1.2252 | 0.2072 | 0.3302 | 0.3275 | 0.0338 | 0.0344 | 0.0498 | 0.0543 | 0.0676 | 0.0450 | 0.0642 |        |
| R147 |      |        |        |        |        |        |        |        |        |        |        |        |        |        |        |        | 2.2090 | 0.2410 | 0.6407 | 0.3911 | 0.0514 | 0.0352 | 0.0616 | 0.0566 | 0.0848 | 0.0390 | 0.0922 |        |
| D21  |      |        |        |        |        |        |        |        |        |        |        |        |        |        |        |        |        | 0.0741 | 1.0727 | 0.8634 | 0.6548 | 0.0711 | 0.4537 | 0.4079 | 0.4924 | 0.1850 | 0.1011 |        |
| G1   |      |        |        |        |        |        |        |        |        |        |        |        |        |        |        |        |        |        | 1.2133 | 5.3169 | 0.3416 | 0.1845 | 0.2011 | 0.4537 | 0.4079 | 0.4924 | 0.1850 | 0.1011 |
| C18  |      |        |        |        |        |        |        |        |        |        |        |        |        |        |        |        |        |        |        | 5.3169 | 0.0845 | 0.1143 | 0.1590 | 0.1803 | 0.3133 | 0.2403 | 0.3752 |        |
| C22  |      |        |        |        |        |        |        |        |        |        |        |        |        |        |        |        |        |        |        |        | 0.0845 | 0.1143 | 0.1590 | 0.1803 | 0.3133 | 0.2403 | 0.3752 |        |
| D61  |      |        |        |        |        |        |        |        |        |        |        |        |        |        |        |        |        |        |        |        | 5.6158 | 1.0667 | 0.5201 | 0.3466 | 0.3429 | 0.0930 |        |        |
| R36  |      |        |        |        |        |        |        |        |        |        |        |        |        |        |        |        |        |        |        |        |        | 1.6248 | 2.9218 | 1.4258 | 0.6480 | 0.7314 | 0.1562 |        |
| D38  |      |        |        |        |        |        |        |        |        |        |        |        |        |        |        |        |        |        |        |        |        |        |        |        |        |        |        |        |
| K2   |      |        |        |        |        |        |        |        |        |        |        |        |        |        |        |        |        |        |        |        |        |        |        |        |        |        |        |        |
| E17  |      |        |        |        |        |        |        |        |        |        |        |        |        |        |        |        |        |        |        |        |        |        |        |        |        |        |        |        |
| C15  |      |        |        |        |        |        |        |        |        |        |        |        |        |        |        |        |        |        |        |        |        |        |        |        |        |        |        |        |
| H14  |      |        |        |        |        |        |        |        |        |        |        |        |        |        |        |        |        |        |        |        |        |        |        |        |        |        |        |        |

FIG. 10. Work-of-charging matrix modeled for Debye screening length  $20\text{\AA}$ , first part. The order of residues is the same as in Fig. 2 of the Supplementary Material, and in Figs. 3(a), 16(a), and 16(b) of the text. Entries are in the dimensionless units of  $e\phi_{ij}/k_B T$ .
